# Supplementary material
Source: MDPI journal article supplement (https://www.mdpi.com/2073-4441/12/12/3517)
Supplement: s1 [file s1]

**Table S1.** ICP-AES instrumental parameters.

| Parameter                     | Settled Condition                       |
|-------------------------------|-----------------------------------------|
| Nebuliser                     | Pneumatic concentric (K-style)          |
| Spray chamber                 | Cyclonic                                |
| Plasma source configuration   | Axial                                   |
| RF Power                      | 1100 W                                  |
| Plasma gas flow rate          | 15.0 L min <sup>-1</sup>                |
| Auxiliary gas flow rate       | 0.75 L min <sup>-1</sup>                |
| Nebuliser gas flow rate       | 1.5 L min <sup>-1</sup>                 |
| Sample uptake rate            | 0.78 L min <sup>-1</sup>                |
| Internal standard uptake rate | 0.22 ml min <sup>-1</sup>               |
| Integration time              | 15 s                                    |
| Replicates                    | 7                                       |
| Analytes and wavelengths (nm) | Al (308.215; 394.401; 396.152)          |
|                               | Ba (233.527; 455.403; 493.408)          |
|                               | Cd (214.439; 226.502)                   |
|                               | Cu (324.754; 327.395)                   |
|                               | Fe (234.350; 238.204; 259.837; 259.940) |
|                               | Lu (291.139) <sup>a</sup>               |
|                               | Mn (257.610; 259.372; 260.568; 293.305) |
|                               | Ni (216.555; 231.604)                   |
|                               | Pb (220.353)                            |
|                               | Ti (323.452; 334.941; 336.122; 337.280) |
|                               | Zn (202.548; 213.857)                   |

<sup>a</sup> Internal standard**Table S2.** Measured and certified values of Al, Cu, Fe, Mn and Zn in certified reference materials BCR-414 (marine plankton) and MURST-ISS-A1 (Antarctic bottom sediment). The concentrations are expressed in % while the uncertainties are expressed as standard deviations for experimental values (n=10) and certified values for MURST-ISS-A1, and as 95% confidence intervals for BCR-414.

|                     | Al           | Cu           | Fe          | Mn       | Zn         |
|---------------------|--------------|--------------|-------------|----------|------------|
| <b>BCR-414</b>      |              |              |             |          |            |
| Measured value      | 2950 ± 120   | 35.3 ± 2.6   | 2170 ± 80   | 317 ± 16 | 120 ± 5    |
| Certified value     | /            | 29.5 ± 1.3   | 1850 ± 190* | 299 ± 12 | 112 ± 3    |
| Recovery %          | /            | 120 %        | 118 %       | 106 %    | 107 %      |
| <b>MURST ISS-A1</b> |              |              |             |          |            |
| Measured value      | 69698 ± 2134 | 3.9 ± 2.2    | 25245 ± 655 | 503 ± 17 | 61.2 ± 2.1 |
| Certified value     | 67100 ± 3300 | 4.20 – 7.38* | 24400 ± 700 | 446 ± 19 | 53.3 ± 2.7 |
| Recovery %          | 104 %        | 93 %         | 104 %       | 113 %    | 115 %      |

\*indicative value
